# Supplementary material
Source: Springer Nature journal article supplement (https://www.springermedizin.de/resource/supplementary/12888_2009_704_MOESM3_ESM.pdf/9478212)

**Bipolar:  
N=120**

**ADHD:  
N=70**

**Bipolar  
but not  
ADHD:  
N=91**

**Bipolar  
and  
ADHD:  
N=29**

**ADHD  
but not  
Bipolar:  
N=41**

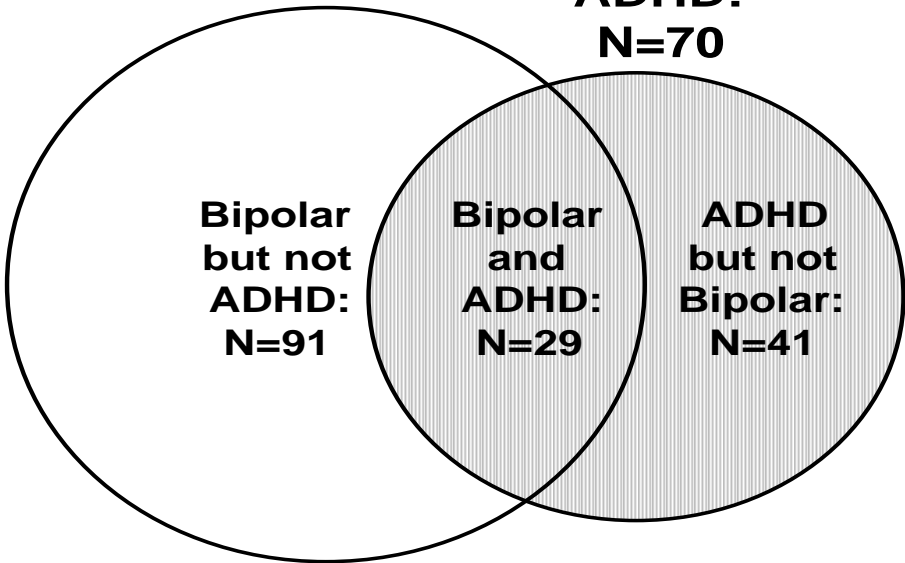

Supplement: MOESM3 [file 9478212]
